# Supplementary material for: Expression of the Prostate Specific Membrane Antigen (PSMA) and Programmed Death-Ligand 1 (PD-L1) on Disseminated Tumor Cells from Early Triple Negative Breast Cancer Patients and their Clinical Impact
Source: Research Square preprint supplement (doi:10.21203/rs.3.rs-6975457/v1), 2025-07-24
Supplement: Supplementary file 2 [file a392e6e3ae8399d14fad09f3.docx]

**SupplTable 1: Patient characteristics**

|  | **Total (% of all applicable)** |
| --- | --- |
| **Total** | 64 |
| Median **Age** at diagnosis [years]  <50 years old  ≥50 years old | 59 (33-84)  27  37 |
| **Menopausal Status**  Premenopausal  Perimenopausal  Postmenopausal | 17/64 (27)  11/64 (17)  36/64 (56) |
| **Histology**  Ductal  Lobular  Others  not known | 43/59 (73)  1/59 ( 2)  15/59 (25)  5/64 |
| **Tumor grading**  I  II  III  not known | 0/63 (0)  12/63 (19)  51/63 (81)  1/64 |
| **Ki 67**  0-10%  11-30%  >30%  not known | 3/51 (6)  6/51 (12)  42/51 (82)  13/64 |
| **Tumor size at first diagnosis (c/T)**  T1a-c  T2  T3  T4 | 22/64 (34)  35/64 (55)  4/64 (6)  3/64 (5) |
| **Tumor size after NACT (ypT)**  ypT0  ypT1  ypT2  ypT3-4  not applicable | 28/59 (48)  17/59 (29)  12/59 (20)  2/59 (3)  5/64 |
| **Nodal Status at first diagnosis (c/pN)**  Node negative  Node positive  N1  N2  N3 | 43/64 (67)  21/64 (33)  13/64 (20)  4/64 (6)  4/64 (6) |
| **Nodal status after NACT (ypN)**  Node negative  Node positive  ypN1  ypN2  ypN3  not applicable | 5/7 (71)  2/7 (29)  1/7 (14)  1/7 (14)  0/7 (0)  57/64 |
| **Pathological response**  Complete response  Partial response  No response  not applicable | 29/63 (46)  26/63 (41)  4/63 (6)  5/63 |
| **Chemotherapy**  yes  Neoadjuvant  Adjuvant  ….not known | 63/64 (98)  59/63 (94)  4/63 (6)  1/64 |
